# Supplementary material for: Ambient Aerosol Is Physically Larger on Cloudy Days in Bondville, Illinois
Source: PubMed Central journal article supplement (PMC9761781; doi:10.1021/acsearthspacechem.2c00207), 2022-11-15
Supplement: sp2c00207_si_001.pdf [file sp2c00207_si_001.pdf]

# Supplemental Information for Ambient Aerosol is Physically Larger on Cloudy Days in Bondville, Illinois

*Madison M. Flesch, Amy E. Christiansen<sup>†</sup>, Alyssa M. Burns, Virendra P. Ghate<sup>a</sup>, Annmarie G. Carlton\**

<sup>1</sup>Department of Chemistry, University of California, Irvine, Irvine, California 92697, United States

<sup>†</sup> Division of Energy, Matter and Systems, University of Missouri – Kansas City, Kansas City, Missouri, 64110, United States

<sup>a</sup>Environmental Science Division, Argonne National Laboratory, Lemont, IL, 60439, United States

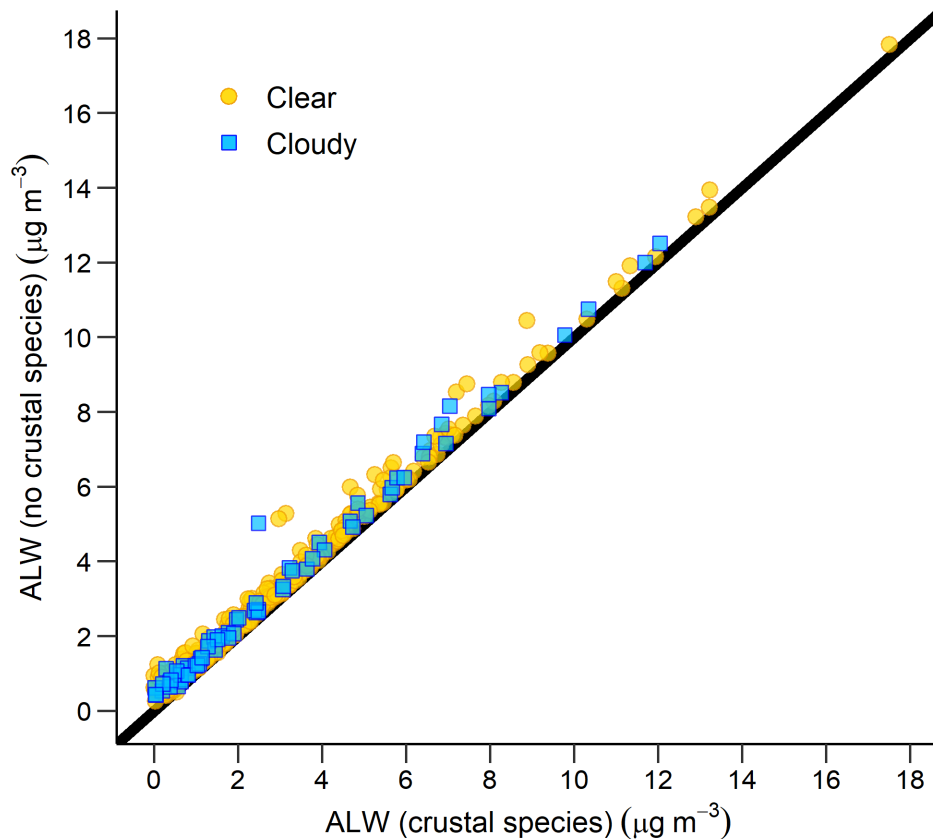

**Figure S1.** Comparison of ISORROPIA model outputs of aerosol liquid water (ALW) mass concentration estimates for 2010 – 2019 at Bondville on predominantly clear sky (gold circles) and predominantly cloudy (blue squares) days. Crustal species include calcium, potassium, magnesium, and sea salt constituents of sodium and chloride. Temperature, relative humidity, and mass concentrations of sulfate and nitrate were kept constant. The black line is a 1:1 line for reference. ALW estimates average 14% lower when crustal species are included.

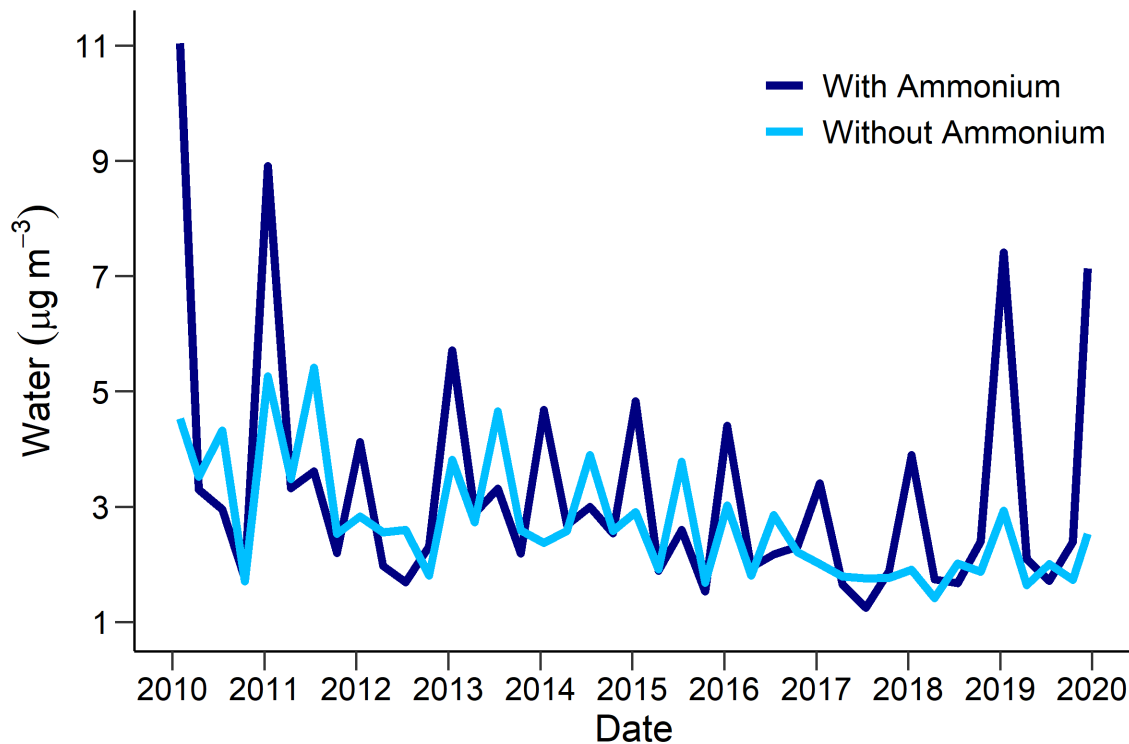

**Figure S2.** Comparison of seasonal average aerosol liquid water (ALW) mass concentration estimates for 2010-2019 at Bondville. Temperature, relative humidity, and mass concentrations of sulfate, nitrate, and crustal species were kept constant. Ammonium values are taken from a co-located CASTNET site, and seasonal aggregates are used as inputs to ISORROPIA. The dark blue trace includes ammonium, while the bright blue trace excludes ammonium. ALW estimates are approximately 21% lower without ammonium, though this is not statistically significant for a T-test with 95% confidence.

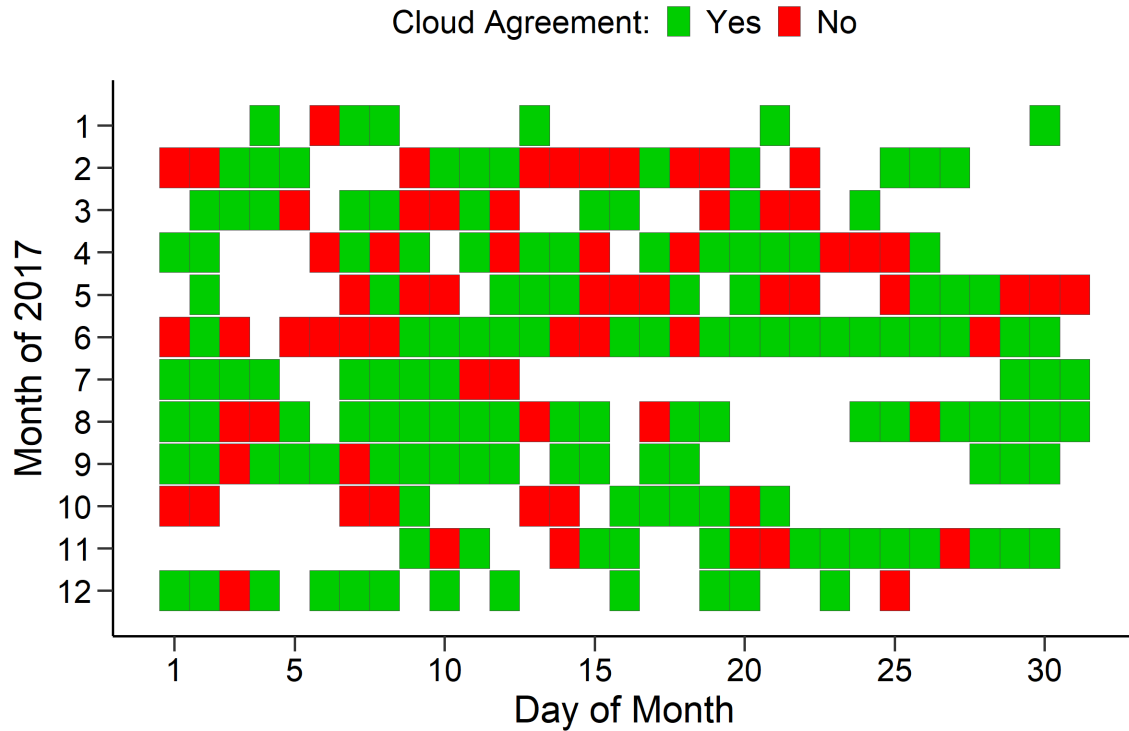

**Figure S3.** Comparison of the AERONET-based cloudiness determination method to GOES-measured cloud top temperature at the Bondville location for daily aggregate AERONET observations for 2017. Green indicates both methods agree, red indicates the methods disagree, with agreement occurring approximately 76% of the time. GOES-13 did not have the 12  $\mu\text{m}$  channel available for thin cirrus cloud detection, which AERONET’s algorithm screened better at the time, plausibly contributing to most of the disagreement occurring from AERONET measurements binned as cloudy and GOES retrievals binned as clear sky.

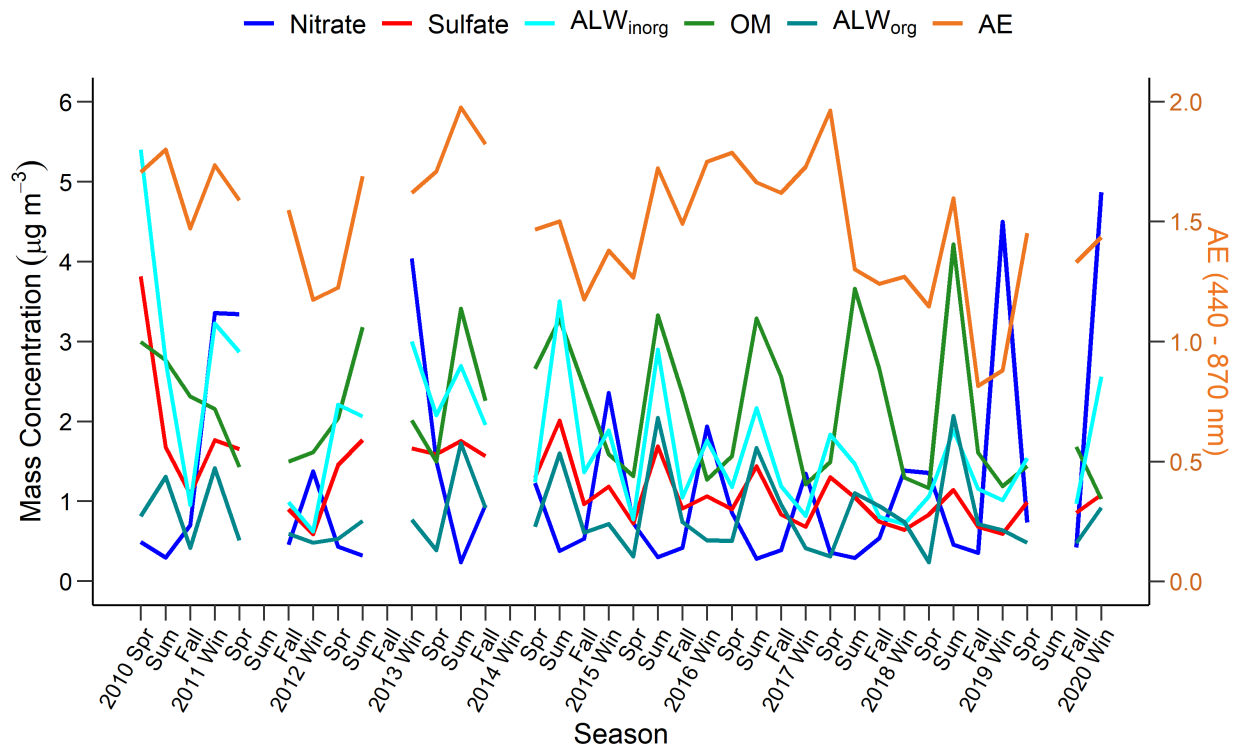

**Figure S4.** Angstrom exponents (orange) and mass concentrations of nitrate (blue), sulfate (red), inorganic aerosol liquid water ( $\text{ALW}_{\text{inorg}}$ , cyan) organic matter (OM, green) over time, and organic aerosol liquid water ( $\text{ALW}_{\text{org}}$ , dark turquoise) at Bondville. Gaps indicate a lack of quality assured data from AERONET for that season that was matched to IMPROVE measurement days. Note that “2020 Win” only contains data from December 2019.

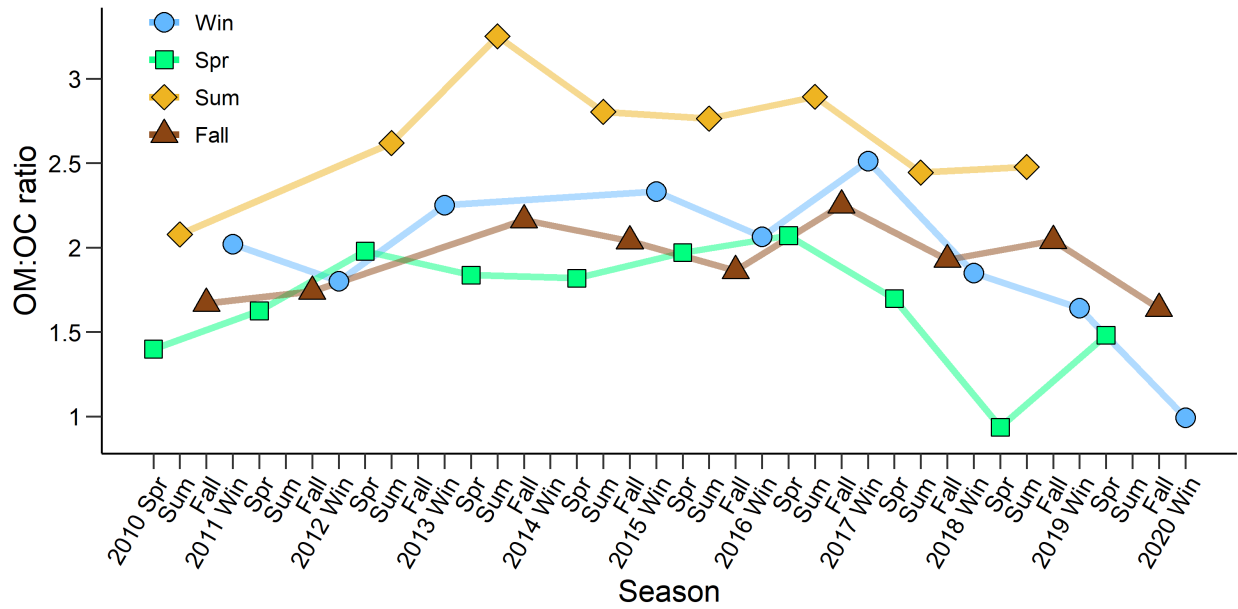

**Figure S5.** Time series of the ratio of organic matter (OM) to organic carbon (OC) calculated annually for winter (blue circles), spring (green squares), summer (gold diamonds), and fall (brown triangles) at Bondville. Gaps in points for each season indicate missing data for that season based on a lack of quality assured data from AERONET for that season that was matched to IMPROVE measurement days. Note that “2020 Win” only contains data from December 2019.

**Table S1.** Predominantly clear sky and cloudy medians and two-sided Mann-Whitney U test p values of aerosol optical depth (AOD) and Ångström exponents. For clarity, p values significantly less than 0.05 are listed as “< 0.05” and statistically significant seasons are bolded.

| Parameter                        | Season | Clear Median | Cloudy Median | Mann-Whitney U test p value | Medians > 0.02 Experimental Uncertainty |
|----------------------------------|--------|--------------|---------------|-----------------------------|-----------------------------------------|
| Angstrom exponent (440 – 870 nm) | Winter | 1.46         | 1.49          | 0.944                       | Y                                       |
|                                  | Spring | <b>1.47</b>  | <b>1.39</b>   | <b>&lt; 0.05</b>            | Y                                       |
|                                  | Summer | <b>1.68</b>  | <b>1.59</b>   | <b>&lt; 0.05</b>            | Y                                       |
|                                  | Fall   | <b>1.45</b>  | <b>1.39</b>   | <b>&lt; 0.05</b>            | Y                                       |
| Aerosol optical depth (440 nm)   | Winter | <b>0.07</b>  | <b>0.08</b>   | <b>&lt; 0.05</b>            | N                                       |
|                                  | Spring | <b>0.11</b>  | <b>0.15</b>   | <b>&lt; 0.05</b>            | Y                                       |
|                                  | Summer | <b>0.17</b>  | <b>0.22</b>   | <b>&lt; 0.05</b>            | Y                                       |
|                                  | Fall   | <b>0.08</b>  | <b>0.10</b>   | <b>&lt; 0.05</b>            | Y                                       |
| Aerosol optical depth (500 nm)   | Winter | <b>0.06</b>  | <b>0.07</b>   | <b>&lt; 0.05</b>            | N                                       |
|                                  | Spring | <b>0.10</b>  | <b>0.12</b>   | <b>&lt; 0.05</b>            | Y                                       |
|                                  | Summer | <b>0.14</b>  | <b>0.18</b>   | <b>&lt; 0.05</b>            | Y                                       |
|                                  | Fall   | <b>0.07</b>  | <b>0.09</b>   | <b>&lt; 0.05</b>            | N                                       |
| Aerosol optical depth (675 nm)   | Winter | <b>0.04</b>  | <b>0.05</b>   | <b>&lt; 0.05</b>            | N                                       |
|                                  | Spring | <b>0.06</b>  | <b>0.08</b>   | <b>&lt; 0.05</b>            | Y                                       |
|                                  | Summer | <b>0.08</b>  | <b>0.11</b>   | <b>&lt; 0.05</b>            | Y                                       |
|                                  | Fall   | <b>0.04</b>  | <b>0.06</b>   | <b>&lt; 0.05</b>            | N                                       |
| Aerosol optical depth (870 nm)   | Winter | <b>0.03</b>  | <b>0.03</b>   | <b>&lt; 0.05</b>            | N                                       |
|                                  | Spring | <b>0.04</b>  | <b>0.06</b>   | <b>&lt; 0.05</b>            | N                                       |
|                                  | Summer | <b>0.06</b>  | <b>0.08</b>   | <b>&lt; 0.05</b>            | Y                                       |
|                                  | Fall   | <b>0.03</b>  | <b>0.04</b>   | <b>&lt; 0.05</b>            | N                                       |

**Table S2.** Total days binned as “clear sky” or “cloudy” using the AERONET quality assurance algorithm method for each season before matching with IMPROVE dates at Bondville from 2010 - 2019 and related days with GOES cloud top temperature observations for 2017.

|        | <i>AERONET (2010 - 2019)</i> |        |       | <i>GOES (2017)</i> |        |       |
|--------|------------------------------|--------|-------|--------------------|--------|-------|
|        | Clear                        | Cloudy | Total | Clear              | Cloudy | Total |
| Winter | 183                          | 31     | 214   | 33                 | 9      | 56    |
| Spring | 232                          | 87     | 319   | 44                 | 16     | 60    |
| Summer | 305                          | 80     | 385   | 53                 | 14     | 67    |
| Fall   | 245                          | 62     | 307   | 45                 | 5      | 50    |



**Table S3.** Predominantly clear sky and cloudy medians and two-sided Mann-Whitney U test p values for meteorological variables of temperature, relative humidity, and planetary boundary layer height. For clarity, p values significantly less than 0.05 are listed as “< 0.05” and statistically significant seasons are bolded.

| Parameter                            | Season        | Clear Median | Cloudy Median | Mann-Whitney U test p value |
|--------------------------------------|---------------|--------------|---------------|-----------------------------|
| Temperature (°C)                     | Winter        | -1.3         | 4.0           | 0.505                       |
|                                      | <b>Spring</b> | <b>11.5</b>  | <b>20.1</b>   | <b>&lt; 0.05</b>            |
|                                      | Summer        | 24.1         | 24.8          | 0.324                       |
|                                      | Fall          | 14.6         | 12.1          | 0.132                       |
| Relative Humidity (%)                | Winter        | 64.7         | 64.2          | 0.915                       |
|                                      | Spring        | 53.2         | 57.0          | 0.106                       |
|                                      | Summer        | 67.1         | 68.2          | 0.561                       |
|                                      | Fall          | 58.6         | 58.6          | 0.439                       |
| Planetary Boundary Layer Height (km) | Winter        | 0.49         | 0.51          | 0.961                       |
|                                      | <b>Spring</b> | <b>0.66</b>  | <b>0.57</b>   | <b>&lt; 0.05</b>            |
|                                      | <b>Summer</b> | <b>0.60</b>  | <b>0.54</b>   | <b>&lt; 0.05</b>            |
|                                      | Fall          | 0.55         | 0.41          | 0.055                       |

**Table S4.** Predominantly clear sky and cloudy distributions two-sided Mann-Whitney U test p values for IMPROVE-measured PM<sub>2.5</sub> chemical species and aerosol liquid water estimates. For clarity, p values significantly less than 0.05 are listed as “< 0.05” and statistically significant seasons are bolded.

| Parameter                                               | Season        | Clear Median | Cloudy Median | Mann-Whitney U test p value |
|---------------------------------------------------------|---------------|--------------|---------------|-----------------------------|
| Inorganic Aerosol Liquid Water ( $\mu\text{g m}^{-3}$ ) | Winter        | 1.60         | 1.14          | 0.329                       |
|                                                         | <b>Spring</b> | <b>1.10</b>  | <b>1.97</b>   | <b>&lt; 0.05</b>            |
|                                                         | Summer        | 2.19         | 2.81          | 0.093                       |
|                                                         | Fall          | 1.05         | 1.27          | 0.183                       |
| Organic Aerosol Liquid Water ( $\mu\text{g m}^{-3}$ )   | Winter        | 0.58         | 1.29          | 0.898                       |
|                                                         | <b>Spring</b> | <b>0.34</b>  | <b>0.62</b>   | <b>&lt; 0.05</b>            |
|                                                         | Summer        | 1.42         | 1.86          | 0.116                       |
|                                                         | Fall          | 0.62         | 0.73          | 0.235                       |
| Nitrate ( $\mu\text{g m}^{-3}$ )                        | Winter        | 2.52         | 1.60          | 0.650                       |
|                                                         | Spring        | 0.86         | 0.85          | 0.621                       |
|                                                         | Summer        | 0.30         | 0.33          | 0.443                       |
|                                                         | Fall          | 0.45         | 0.84          | 0.052                       |
| Sulfate ( $\mu\text{g m}^{-3}$ )                        | Winter        | 1.10         | 0.92          | 0.301                       |
|                                                         | <b>Spring</b> | <b>0.97</b>  | <b>1.32</b>   | <b>&lt; 0.05</b>            |
|                                                         | Summer        | 1.27         | 1.72          | 0.113                       |
|                                                         | Fall          | 0.45         | 0.90          | 0.599                       |
| Organic Mass ( $\mu\text{g m}^{-3}$ )                   | Winter        | 1.55         | 1.77          | 0.961                       |
|                                                         | <b>Spring</b> | <b>1.31</b>  | <b>1.99</b>   | <b>&lt; 0.05</b>            |
|                                                         | Summer        | 3.13         | 3.55          | 0.110                       |
|                                                         | Fall          | 2.20         | 2.52          | 0.536                       |

|                                                                                        |               |              |              |                  |
|----------------------------------------------------------------------------------------|---------------|--------------|--------------|------------------|
| Potassium<br>( $\mu\text{g m}^{-3}$ )                                                  | Winter        | 0.032        | 0.038        | 0.595            |
|                                                                                        | <b>Spring</b> | <b>0.032</b> | <b>0.041</b> | <b>&lt; 0.05</b> |
|                                                                                        | Summer        | 0.031        | 0.031        | 0.387            |
|                                                                                        | Fall          | 0.036        | 0.037        | 0.496            |
| Chloride<br>( $\mu\text{g m}^{-3}$ )                                                   | Winter        | 0.058        | 0.038        | 0.258            |
|                                                                                        | Spring        | 0.020        | 0.026        | 0.093            |
|                                                                                        | Summer        | 0.016        | 0.016        | 0.425            |
|                                                                                        | Fall          | 0.020        | 0.016        | 0.546            |
| Calcium<br>( $\mu\text{g m}^{-3}$ )                                                    | Winter        | 0.024        | 0.033        | 0.602            |
|                                                                                        | Spring        | 0.035        | 0.031        | 0.907            |
|                                                                                        | Summer        | 0.052        | 0.041        | 0.743            |
|                                                                                        | Fall          | 0.066        | 0.058        | 0.193            |
| Magnesium<br>( $\mu\text{g m}^{-3}$ )                                                  | Winter        | 0.007        | 0.006        | 0.549            |
|                                                                                        | Spring        | 0.012        | 0.017        | 0.073            |
|                                                                                        | Summer        | 0.014        | 0.007        | 0.112            |
|                                                                                        | Fall          | 0.013        | 0.007        | 0.256            |
| Sodium<br>( $\mu\text{g m}^{-3}$ )                                                     | Winter        | 0.020        | 0.018        | 0.816            |
|                                                                                        | Spring        | 0.012        | 0.014        | 0.149            |
|                                                                                        | Summer        | 0.010        | 0.013        | 0.249            |
|                                                                                        | Fall          | 0.010        | 0.006        | 0.300            |
| PM <sub>2.5</sub> Dry<br>Mass +<br>Aerosol<br>Liquid Water<br>( $\mu\text{g m}^{-3}$ ) | Winter        | 10.20        | 10.20        | 0.716            |
|                                                                                        | Spring        | <b>6.22</b>  | <b>10.47</b> | <b>&lt; 0.05</b> |
|                                                                                        | Summer        | 10.30        | 13.40        | 0.083            |
|                                                                                        | Fall          | 7.18         | 8.81         | 0.415            |

#### AUTHOR INFORMATION

##### Corresponding Author

\*E-mail: [agcarlo@uci.edu](mailto:agcarlo@uci.edu)
